# Supplementary material for: Combined proinflammatory cytokine and cognate activation of invariant natural killer T cells enhances anti-DNA antibody responses
Source: PubMed Central journal article supplement — Proc Natl Acad Sci U S A. 2020 Apr 15;117(16):9054–63. doi: 10.1073/pnas.1920463117 (PMC7183147; doi:10.1073/pnas.1920463117), 2020-04-15
Supplement: pnas.1920463117.sapp.pdf [file pnas.1920463117.sapp.pdf]

Supplementary figure-1

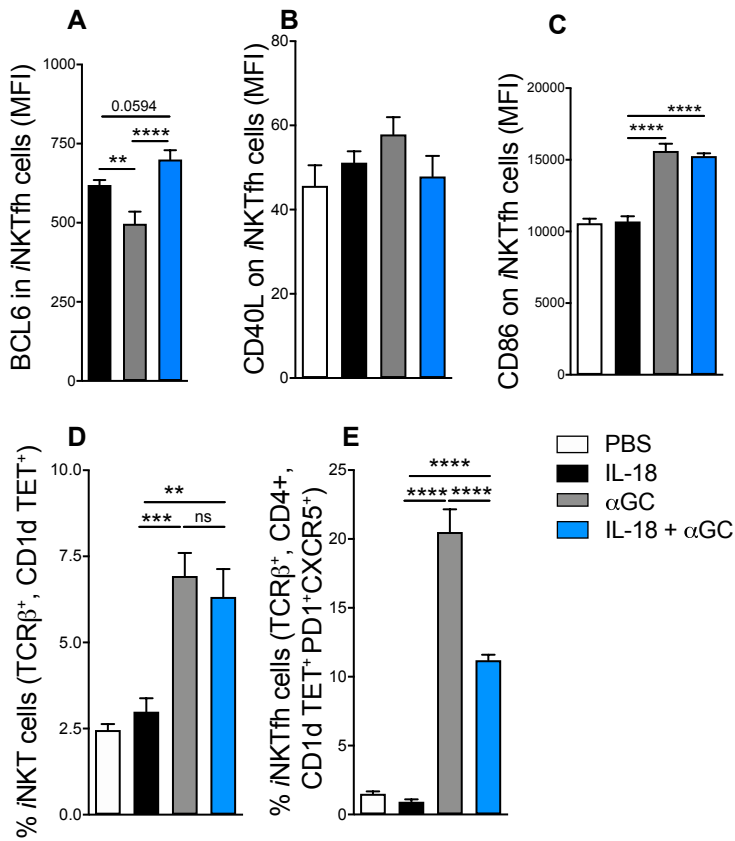

**Supplementary figure-1:** (A) Intracellular expression of BCL6; cell surface expression of (B) CD40L and (C) CD86 on iNKTfh cells; percent of (D) iNKT and (E) iNKTfh in the spleen on day 7. One experiment (n=6 mice/group). One way Anova. \*\*p<0.005, \*\*\*p<0.001, \*\*\*\*p<0.0001. Graphs display group mean +/- SEM.

Supplementary figure-2

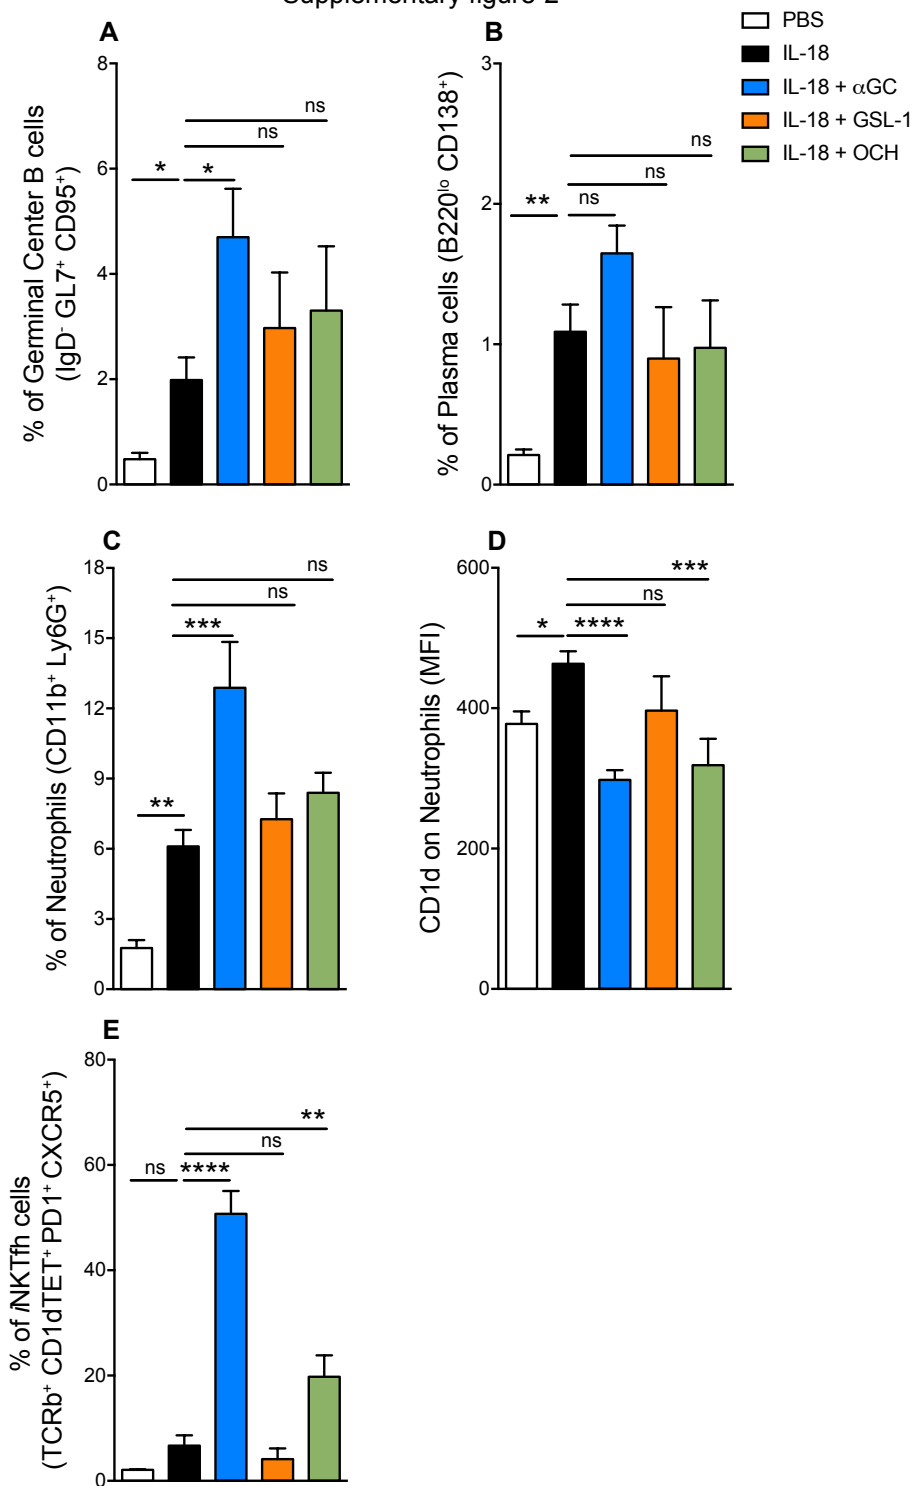

**Supplementary figure-2: GSL-1 or OCH activated *i*NKT cells do not provide B cell help during chronic inflammation.** 5 $\mu$ g of  $\alpha$ GalCer Th1 polarising glycolipid GSL-1 or Th2 polarising glycolipid OCH were injected on day one in the IL-18 model as depicted in figure-1A. Single cell suspensions from spleens of these mice were analyzed by flow cytometry on day 12. Data show percentage of (A) Germinal center B cells, (B) Plasma cells, (C) neutrophils, (D) CD1d median fluorescence intensity (MFI) on neutrophils and (E) *i*NKT follicular helper cells. Data representative of 4 experiments with 3-5 mice/group. Statistical test: One way ANOVA. p-values: \* $<0.05$ , \*\* $<0.005$ , \*\*\* $<0.001$ , \*\*\*\* $<0.0001$ , ns: not significant. Graphs display group mean  $\pm$  SEM.

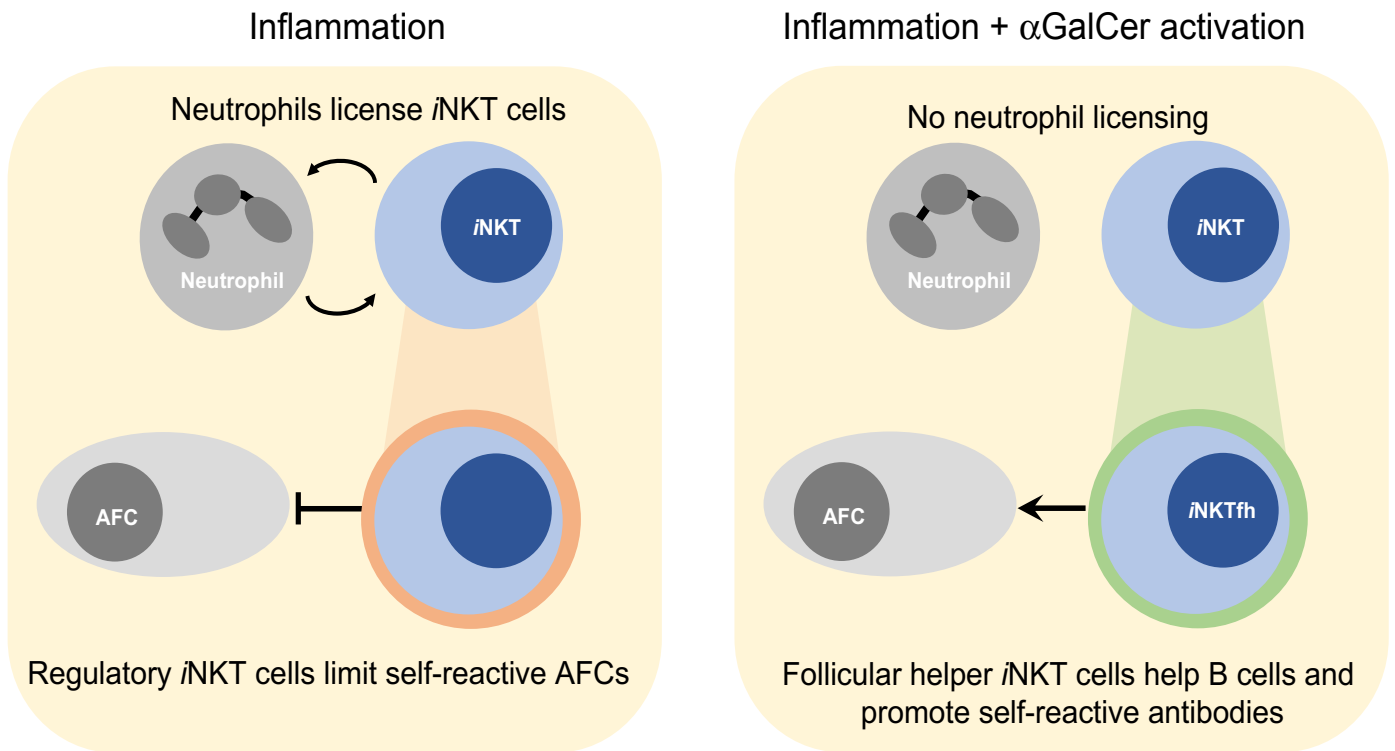

**Supplementary figure-3:** (A) Under inflammatory conditions, *i*NKT cells are licensed by neutrophils to regulate autoreactive antibody forming cells (AFC). (B) When inflammation is combined with  $\alpha$ GalCer, *i*NKT cells promote B cell response, including those that are self-reactive by providing B cell help.
